# Supplementary material
Source: PubMed Central journal article supplement (PMC4553372)
Supplement: Supp_Fig1.pdf [file Supp_Fig1.pdf]

## Supplementary Data

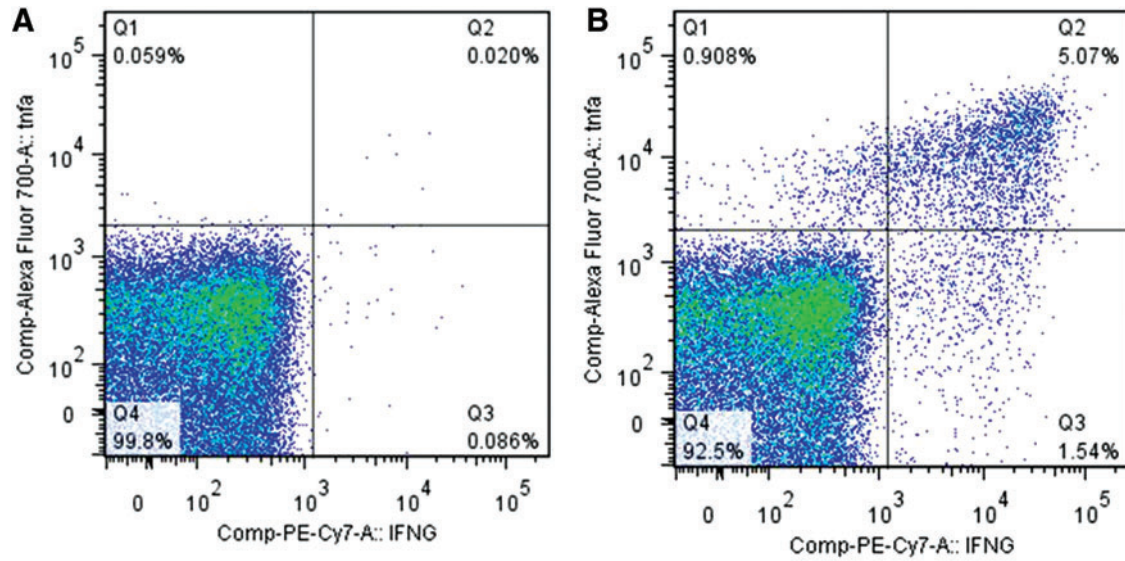

**SUPPLEMENTARY FIG. S1.** Gating strategy for cells selected by viability (AquaVi dye exclusion), CD3<sup>+</sup>, and CD8<sup>+</sup>. Percentage (%) expression of interferon (IFN)- $\gamma$  (x-axis) or tumor necrosis factor (TNF)- $\alpha$  (y-axis) is shown in response to media alone (A) or CMV antigen stimulation (B).
