# Supplementary material
Source: PubMed Central journal article supplement (PMC4553372)
Supplement: Supp_Table1.pdf [file Supp_Table1.pdf]

SUPPLEMENTARY TABLE S1. ODDS OF LOW FUNCTION BY THE PERCENTAGE OF CD4<sup>+</sup> or CD8<sup>+</sup> T CELLS WITH SPECIFIED CELL MARKERS IN RESPONSE TO CYTOMEGALOVIRUS STIMULATION

| <i>CMV-specific cell response</i>                                                                   | <i>Odds ratio (95% CI)<sup>a</sup></i> | <i>p value</i> |
|-----------------------------------------------------------------------------------------------------|----------------------------------------|----------------|
| CMV-specific CD4 <sup>+</sup> T cell responses                                                      |                                        |                |
| % CD4 <sup>+</sup> T cells TNF- $\alpha$ <sup>+</sup> IFN- $\gamma$ <sup>-</sup> in response to CMV | 0.78 (0.53, 1.14)                      | 0.194          |
| % CD4 <sup>+</sup> T cells TNF- $\alpha$ <sup>+</sup> IFN- $\gamma$ <sup>+</sup> in response to CMV | 0.93 (0.80, 1.10)                      | 0.405          |
| % CD4 <sup>+</sup> T cells TNF- $\alpha$ <sup>-</sup> IFN- $\gamma$ <sup>+</sup> in response to CMV | 1.10 (0.86, 1.41)                      | 0.447          |
| CMV-specific CD8 <sup>+</sup> T cell response                                                       |                                        |                |
| % CD8 <sup>+</sup> T cells TNF- $\alpha$ <sup>+</sup> IFN- $\gamma$ <sup>-</sup> in response to CMV | 0.92 (0.72, 1.19)                      | 0.541          |
| % CD8 <sup>+</sup> T cells TNF- $\alpha$ <sup>+</sup> IFN- $\gamma$ <sup>+</sup> in response to CMV | 1.02 (0.93, 1.13)                      | 0.619          |
| % CD8 <sup>+</sup> T cells TNF- $\alpha$ <sup>-</sup> IFN- $\gamma$ <sup>+</sup> in response to CMV | 1.03 (0.91, 1.15)                      | 0.669          |

<sup>a</sup>Odds ratio reported as the incremental odds of low physical function per 0.05 log increase in the % of each cell marker. All reported odds ratios are unadjusted.

CMV, cytomegalovirus; TNF, tumor necrosis factor; IFN, interferon.
